# Supplementary material for: Neuroprotective actions of a fatty acid nitroalkene in Parkinson’s disease
Source: PubMed Central journal article supplement (PMC10082007; doi:10.1038/s41531-023-00502-3), 2023-04-07
Supplement: 41531_2023_502_MOESM1_ESM.pdf [file 41531_2023_502_MOESM1_ESM.pdf]

## Supplementary Material

### Neuroprotective actions of a fatty acid nitroalkene in Parkinson's disease.

Roberto Di Maio<sup>a,b\*</sup>, Matthew T. Keeney<sup>a,b,c</sup>, Veronika Cechova<sup>c</sup>, Amanda Mortimer<sup>a,b</sup>, Ahssan Sekandari<sup>c</sup>, Pascal Rowart<sup>c</sup>, J. Timothy Greenamyre<sup>a,b</sup>, Bruce A. Freeman<sup>c</sup>, Marco Fazzari<sup>c\*</sup>

<sup>a</sup> Pittsburgh Institute for Neurodegenerative Diseases, <sup>b</sup> Department of Neurology, University of Pittsburgh, Pittsburgh, PA, 15213, U.S.A. <sup>c</sup> Department of Pharmacology and Chemical Biology, University of Pittsburgh, 200 Lothrop Street, Pittsburgh, PA, 15261, U.S.A.

\*Corresponding Authors:

R. Di Maio: [rod16@pitt.edu](mailto:rod16@pitt.edu)

M. Fazzari: [maf167@pitt.edu](mailto:maf167@pitt.edu)

**Supplementary Table 1.** Antibodies used in this study.

**Supplementary Figure 1.** Cytotoxicity of 10-NO<sub>2</sub>-OA in N27-A dopaminergic cells.

**Supplementary Figure 2.** 10-NO<sub>2</sub>-OA prevents rotenone-induced NOX2 and LRRK2 activation and oxidative stress in vitro.

**Supplementary Figure 3.** 10-NO<sub>2</sub>-OA activates Nrf2-dependent gene expression in rotenone treated N27-A dopaminergic cells.

**Supplementary Figure 4.** Analysis of free 10-NO<sub>2</sub>-OA and its inactive metabolite in rat brain (cohort 2).

**Supplementary Figure 5.** 10-NO<sub>2</sub>-OA inhibited lipid peroxidation (4-HNE) in the subacute PD model of rotenone.

**Supplementary Figure 6.** 10-NO<sub>2</sub>-OA inhibited NOX2 activation in SNpc of rat rotenone model.

**Supplementary Figure 7.** 10-NO<sub>2</sub>-OA prevented rotenone-induced LRRK2 activation in SNpc.

**Supplementary Figure 8.** Validation of PL assays for LRRK2 and NOX2 by antibody depletion.

**Supplementary Figure 9.** 10-NO<sub>2</sub>-OA inhibits  $\alpha$ -synuclein-mediated mitochondrial import impairment in the subacute PD model of rotenone.

**Supplementary Figure 10.** Analysis of rotenone in whole rat brain (cohort 2).

| Host   | Antibody                                    | Catalog # | Vendor                   | Dilution                    | Use                                              |
|--------|---------------------------------------------|-----------|--------------------------|-----------------------------|--------------------------------------------------|
| Mouse  | NOX2/gp91 <sup>phox</sup>                   | ab80897   | Abcam                    | 1:1000 (ICC)<br>1:500 (IHC) | PLA NOX2 activity                                |
| Rabbit | NCF1[FPR13131-25]<br>(p47 <sup>phox</sup> ) | ab181090  | Abcam                    | 1:1000 (ICC)<br>1:500 (IHC) | PLA NOX2 activity                                |
| Mouse  | $\alpha$ -synuclein                         | 610787    | BD Transduction          | 1:1000 (ICC)<br>1:500 (IHC) | PLA 4-HNE- $\alpha$ -syn PLA $\alpha$ -syn-TOM20 |
| Rabbit | 4-hydroxynonenal                            | ab46545   | Abcam                    | 1:1000 (ICC)<br>1:500 (IHC) | PLA 4-HNE- $\alpha$ -syn 4-HNE IHC               |
| Rabbit | TOM20                                       | ab186735  | Abcam                    | 1:500 (IHC)                 | PLA $\alpha$ -syn-TOM20                          |
| Rabbit | LRRK2 (pS1292)                              | ab203181  | Abcam                    | 1:1000 (ICC)<br>1:500 (IHC) | PLA LRRK2 activity                               |
| Mouse  | LRRK2 (N241A)                               | 75-253    | UC Davis                 | 1:1000 (ICC)<br>1:500 (IHC) | PLA LRRK2 activity                               |
| Sheep  | Tyrosine Hydroxylase                        | AB1542    | Millipore                | 1:2000 (IHC)                | DA neurons marker                                |
| Rabbit | Iba1                                        | 019-19741 | Wako                     | 1:500 (IHC)                 | Microglial marker                                |
| Mouse  | Heme Oxygenase-1 (HO-1)                     | MA1-112   | Thermo Fisher Scientific | 1:250 (IHC)                 | HO-1 IHC                                         |
| Rabbit | Nrf2                                        | Sc-722    | Santa Cruz               | 1:500 (IHC)                 | Nrf2 IHC                                         |

**Supplementary Table 1.** Antibodies used in this study.

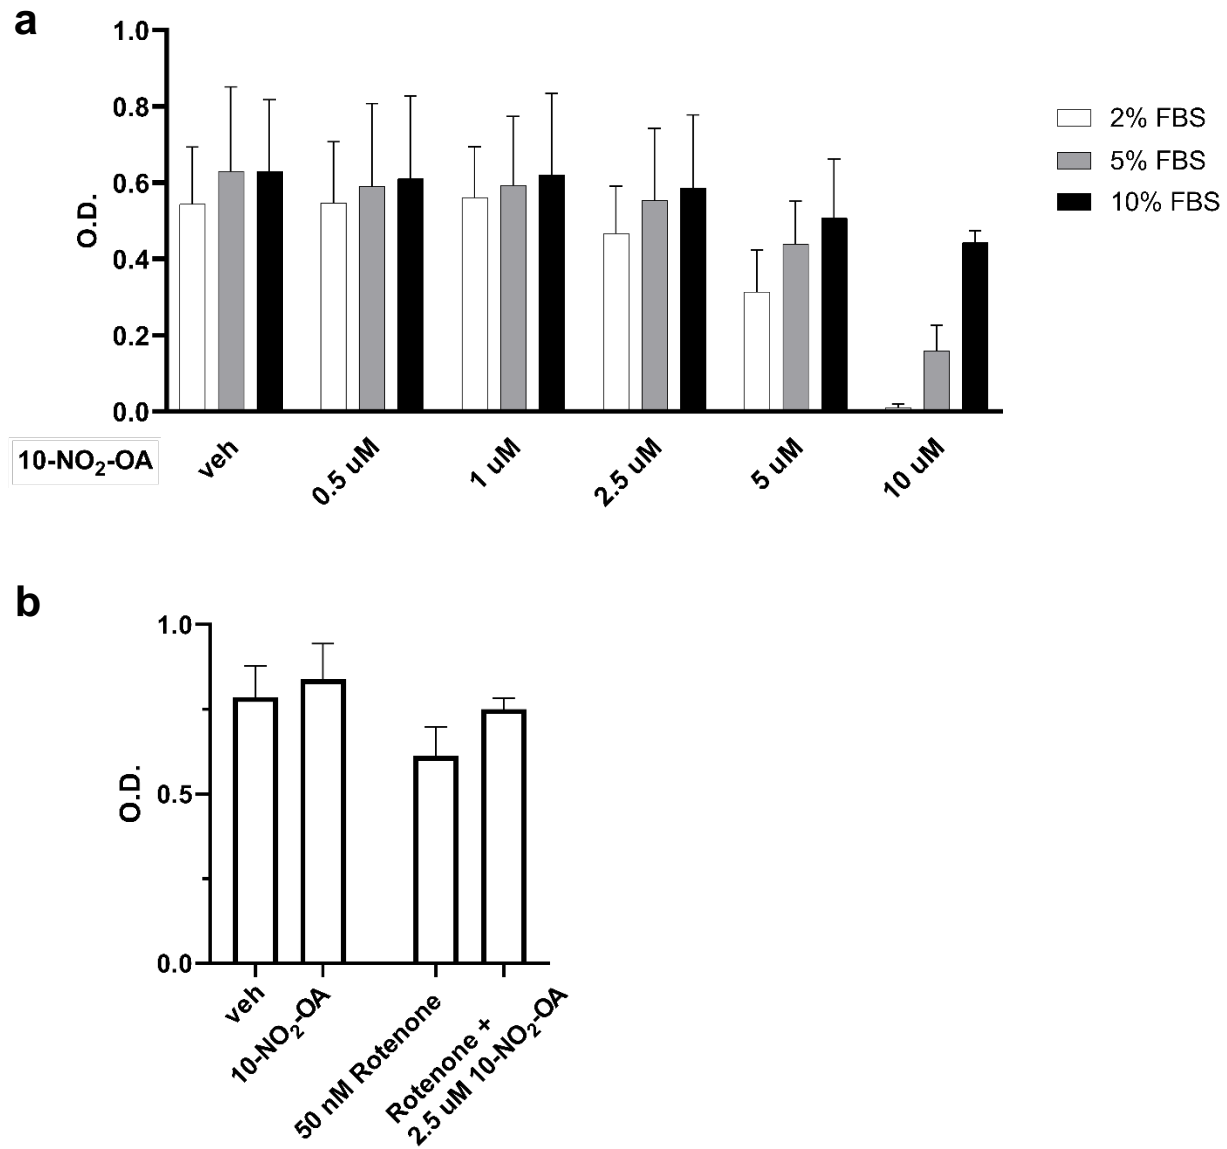

**Supplementary Figure 1. Cytotoxicity of 10-NO<sub>2</sub>-OA in N27-A dopaminergic cells.** Cell viability was assessed by MTT assay and recorded by optical density (O.D.). N27A dopaminergic cells were exposed for 24 hours to: (a) 2-5-10% FBS, Vehicle and increasing concentrations of 10-NO<sub>2</sub>-OA (0.5 μM-10 μM). (b) Vehicle, Rotenone (50 nM) and Rotenone (50 nM) + 10-NO<sub>2</sub>-OA (2.5 μM) in 2% FBS. All data represents the mean ± SD of at least three independent experiments with n=3.

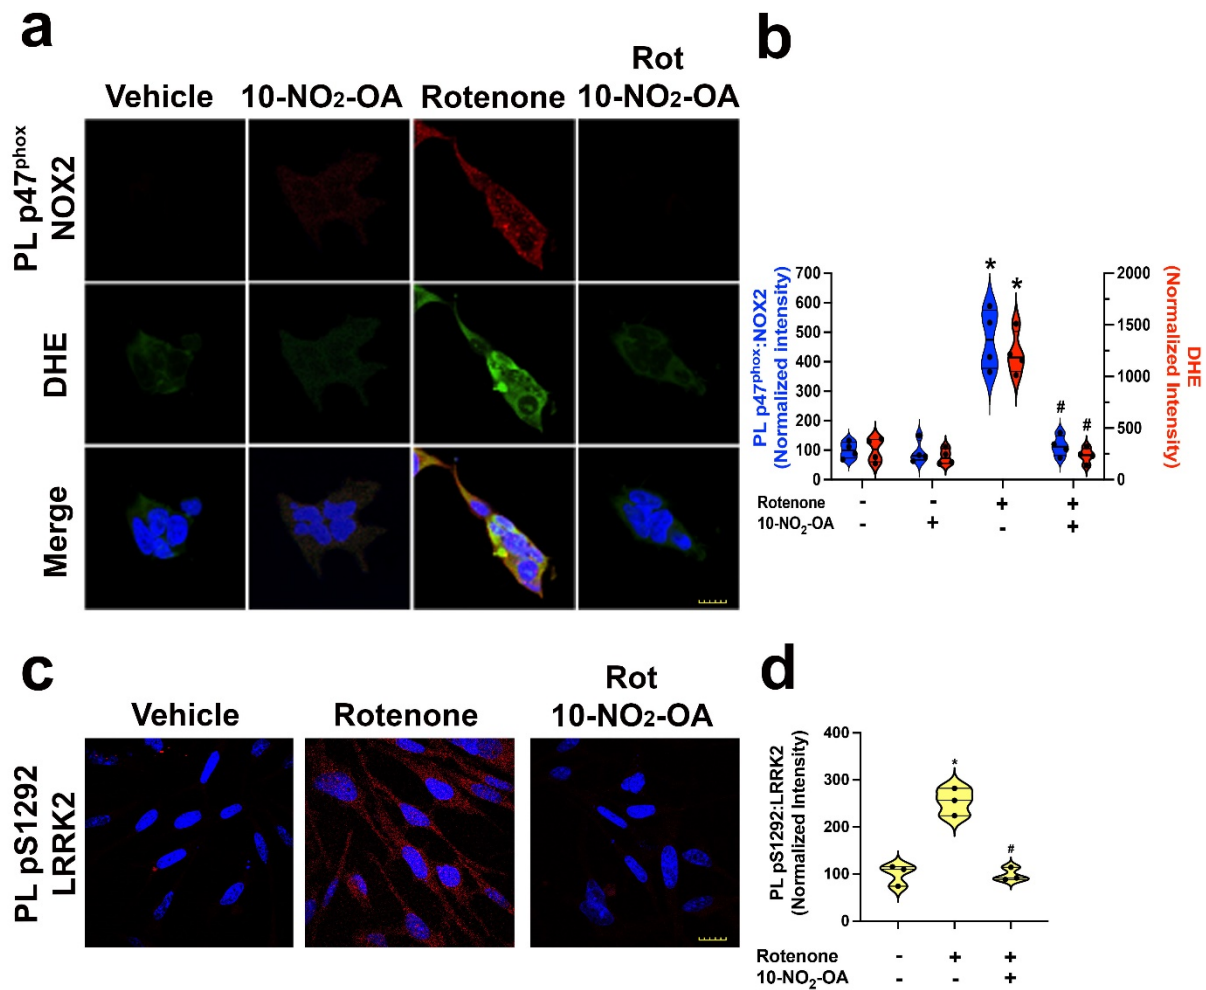

**Supplementary Figure 2. 10-NO<sub>2</sub>-OA prevents rotenone-induced NOX2 and LRRK2 activation and oxidative stress *in vitro*.** N27A dopaminergic cells were exposed for 24 hours to Vehicle, Rotenone (50 nM) and Rotenone (50 nM) + 10-NO<sub>2</sub>-OA (2.5 μM). (a) Rotenone elicited an increase in NOX2 activation as detected PL p47<sup>phox</sup>:NOX2 (red). This was accompanied by an increase in cytoplasmic superoxide measured by DHE (green). Both NOX2 activation and DHE were prevented by co-treatment with 10-NO<sub>2</sub>-OA (Scale bar: 5μm). (b) Quantitative analysis of PLA-related fluorescence intensity. (c) Co-treatment with 10-NO<sub>2</sub>-OA prevented rotenone mediated LRRK2 activation (PL pS1292:LRRK2, red - Scale bar: 30μm). (d) Quantitative analysis of PLA-related fluorescence intensity. Each symbol represents average of normalized signal (with Vehicle set at 100%) from a single independent experiment. Statistical testing by ANOVA with post hoc Bonferroni correction (\*, p<0.0001 compared to Vehicle, #, p<0.0001 compared to Rotenone).

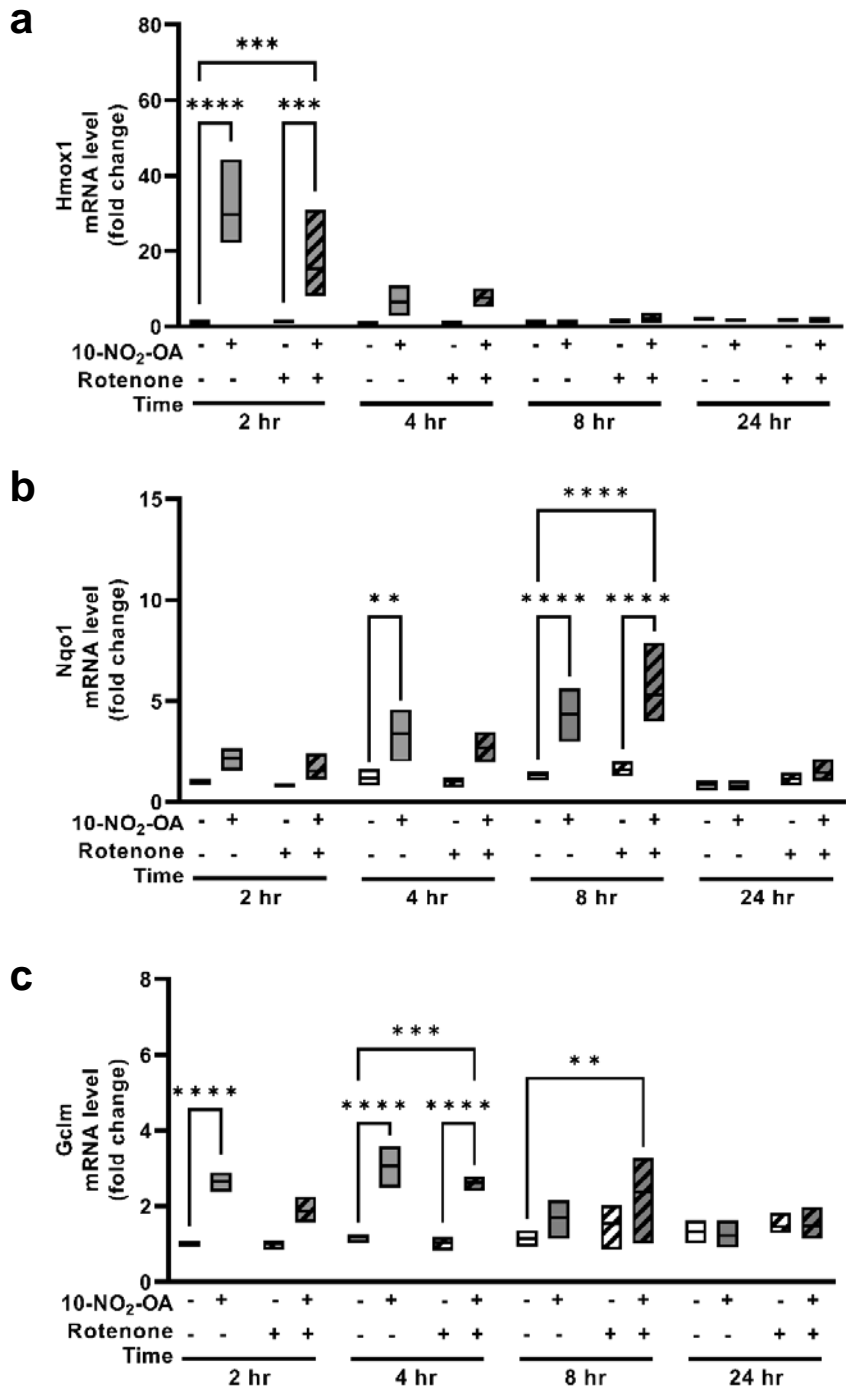

**Supplementary Figure 3. 10-NO<sub>2</sub>-OA activates Nrf2-dependent gene expression in rotenone treated N27-A dopaminergic cells.** Relative mRNA levels of the following Nrf2 target genes: (a) heme oxygenase-1 (Hmx1, HO-1), (b) NAD(P)H dehydrogenase quinone-1 (Nqo-1), and (c) glutamate–cysteine ligase modifier subunit (Gclm), after treatment with 10-NO<sub>2</sub>-OA (2.5 μM) and Rotenone (50 nM) for 2, 4, 8 and 24 hours in N27-A rat dopaminergic neural cell line. Values represent the range (minimum-maximum)

and mean of 4 independent experiments  $n=1$  with statistical significance performed by two-way ANOVA with post hoc Bonferroni correction indicated by \*\*\*\*  $p \leq 0.0001$ , \*\*\*  $p \leq 0.001$ , and \*\*  $p \leq 0.01$ .

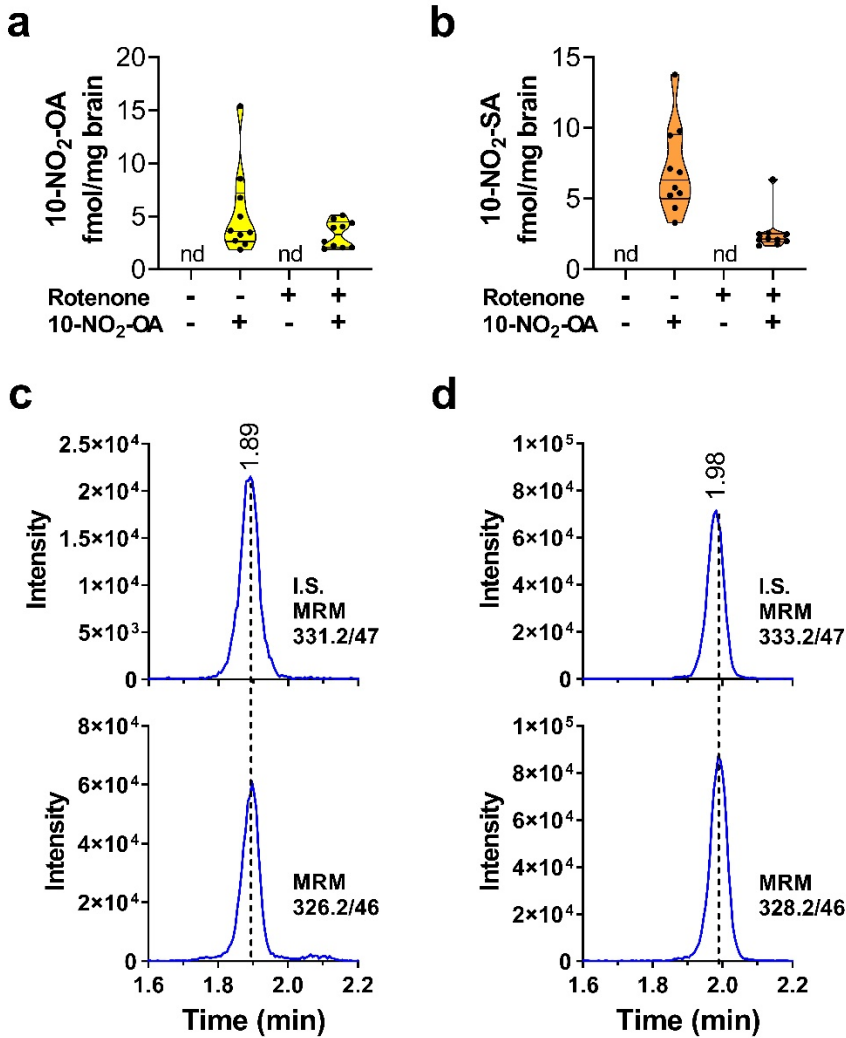

**Supplementary Figure 4. Analysis of free 10-NO<sub>2</sub>-OA and its inactive metabolite in rat brain (cohort 2).** Brain concentrations of (a) 10-NO<sub>2</sub>-OA, and (b) 10-NO<sub>2</sub>-SA, five hours after the last treatments, were obtained by HPLC-MS/MS analysis using calibration curves in presence of the labeled internal standards 10-NO<sub>2</sub>-[<sup>15</sup>N/D<sub>4</sub>]OA and 10-NO<sub>2</sub>-[<sup>15</sup>N/D<sub>4</sub>]SA respectively. Representative extracted ion chromatograms in rat brain treated with Rotenone + 10-NO<sub>2</sub>-OA, (c) the internal standard 10-NO<sub>2</sub>-[<sup>15</sup>N/D<sub>4</sub>]OA (upper panel, MRM 331.2/47) and 10-NO<sub>2</sub>-OA (lower panel, MRM 326.2/46), and (d) the internal standard 10-NO<sub>2</sub>-[<sup>15</sup>N/D<sub>4</sub>]SA (upper panel, MRM 333.2/47) and 10-NO<sub>2</sub>-SA (lower panel, MRM 328.2/46). nd = not detected.

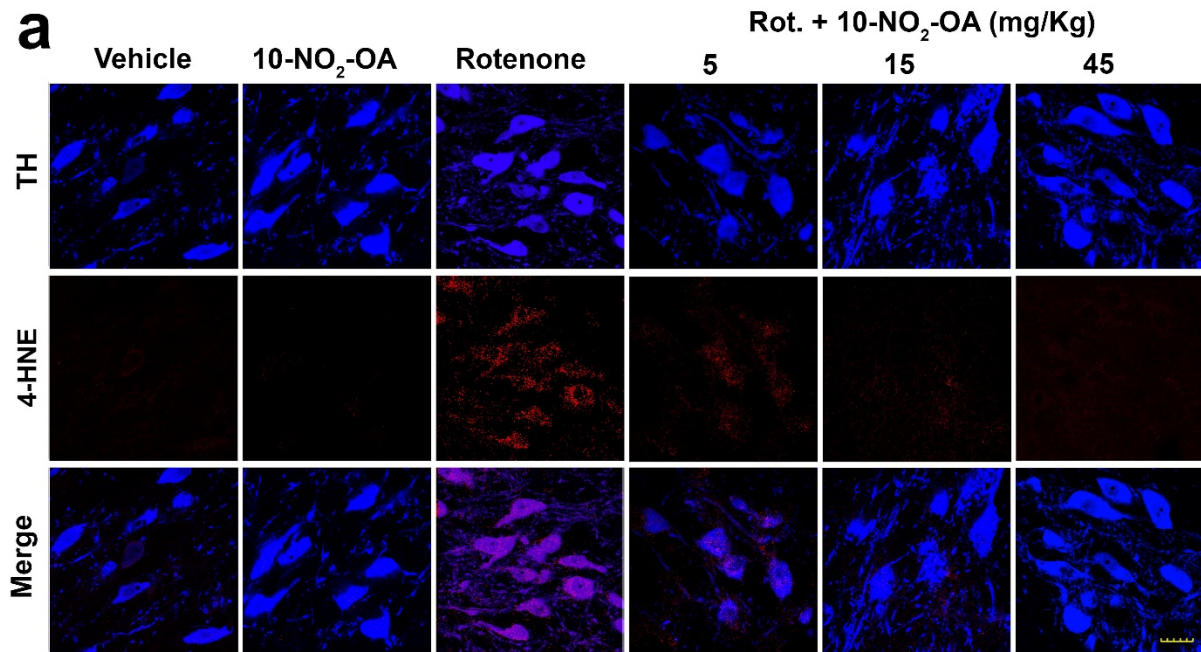

**b**

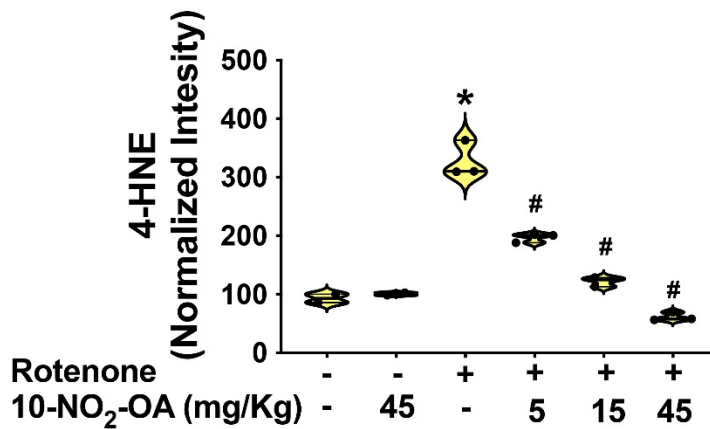

**Supplementary Figure 5. 10-NO<sub>2</sub>-OA inhibited lipid peroxidation (4-HNE) in the subacute PD model of rotenone.** (a) 4-HNE immunostaining (red) in dopaminergic neurons (TH, blue) in the SNpc of rats (cohort 1 – Scale bar: 30μm) with below correspondent quantifications of the fluorescence signal (b). Symbols represent the normalized means of the intensity (with Vehicle set at 100%) from a single animal (6 slices/animal). Statistical analysis was performed by one-way ANOVA with post hoc Bonferroni correction (\*,  $p < 0.0001$  compared to Vehicle, #,  $p < 0.0001$  compared to Rotenone).

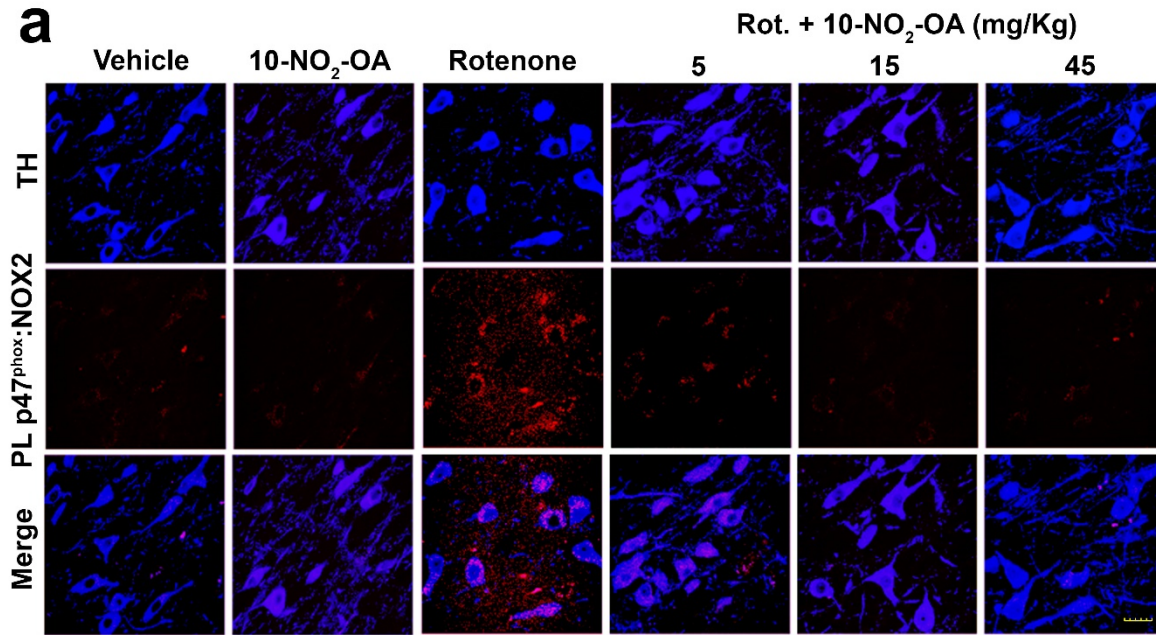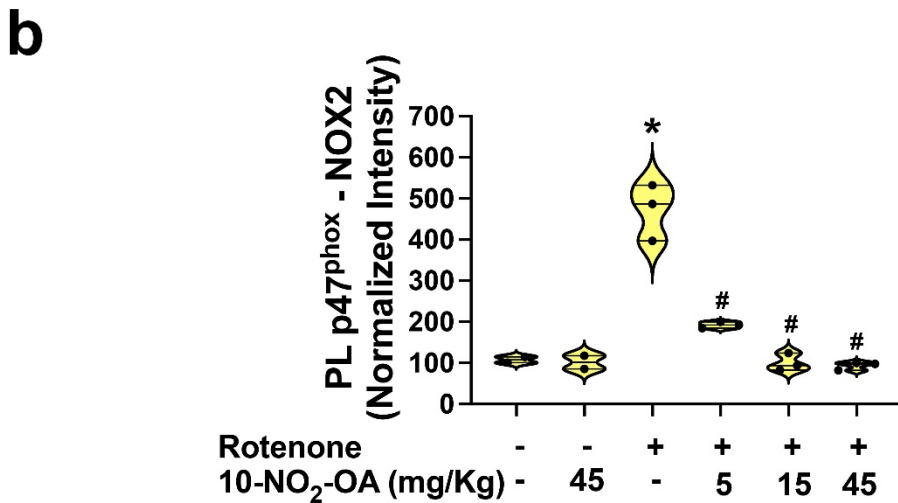

**Supplementary Figure 6. 10-NO<sub>2</sub>-OA inhibited NOX2 activation in SNpc of rat rotenone model.** (a) PL p47<sup>phox</sup>:NOX2 (red) in dopaminergic neurons (TH, blue) in the SNpc of cohort 1 rats (Scale bar: 30 $\mu$ m). (b) Quantifications of the fluorescence signal. Symbols represent the normalized means of the intensity (with Vehicle set at 100%) from a single animal (6 slices /animal). Statistical analysis was performed by one-way ANOVA with post hoc Bonferroni correction (\*,  $p < 0.0001$  compared to Vehicle, #,  $p < 0.0001$  compared to Rotenone).



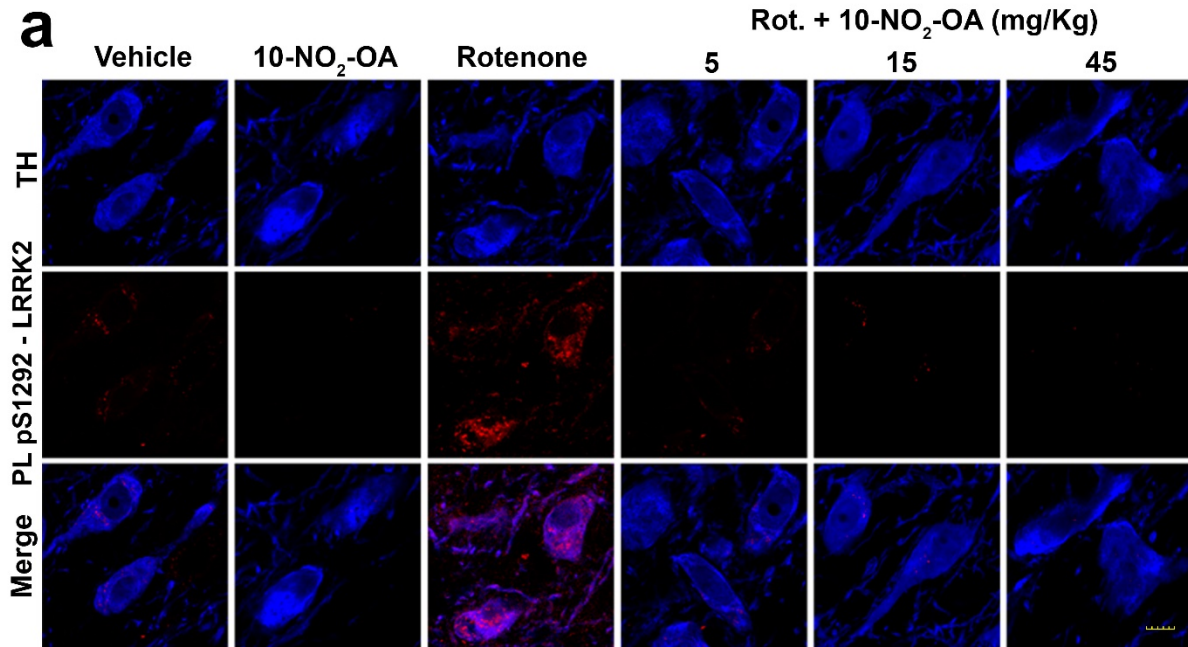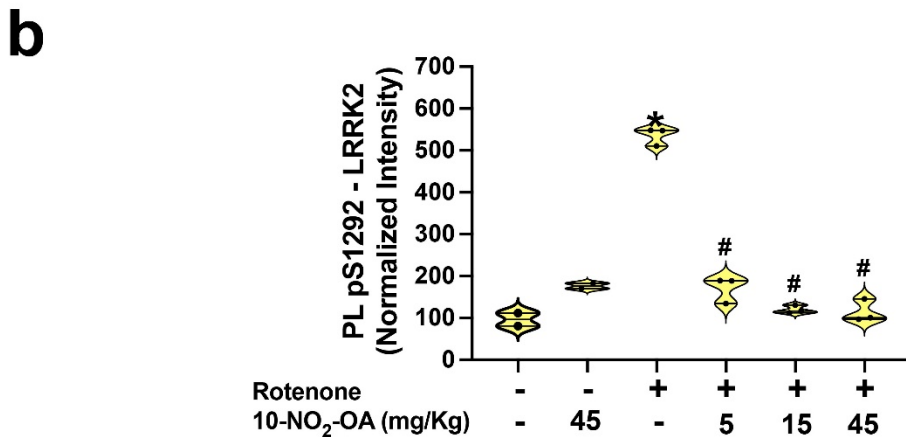

**Supplementary Figure 7. 10-NO<sub>2</sub>-OA prevented rotenone-induced LRRK2 activation in SNpc.** (a) PL pS1292-LRRK2 (red) in dopaminergic neurons (TH, blue) in the SNpc of cohort 1 animals (Scale bar: 20 $\mu$ m). (b) Quantifications of the fluorescence signal. Symbols represent the normalized means of the intensity (with Vehicle set at 100%) from a single animal (6 slices /animal). Statistical analysis was performed by one-way ANOVA with post hoc Bonferroni correction (\*,  $p < 0.0001$  compared to Vehicle, #,  $p < 0.0001$  compared to Rotenone).

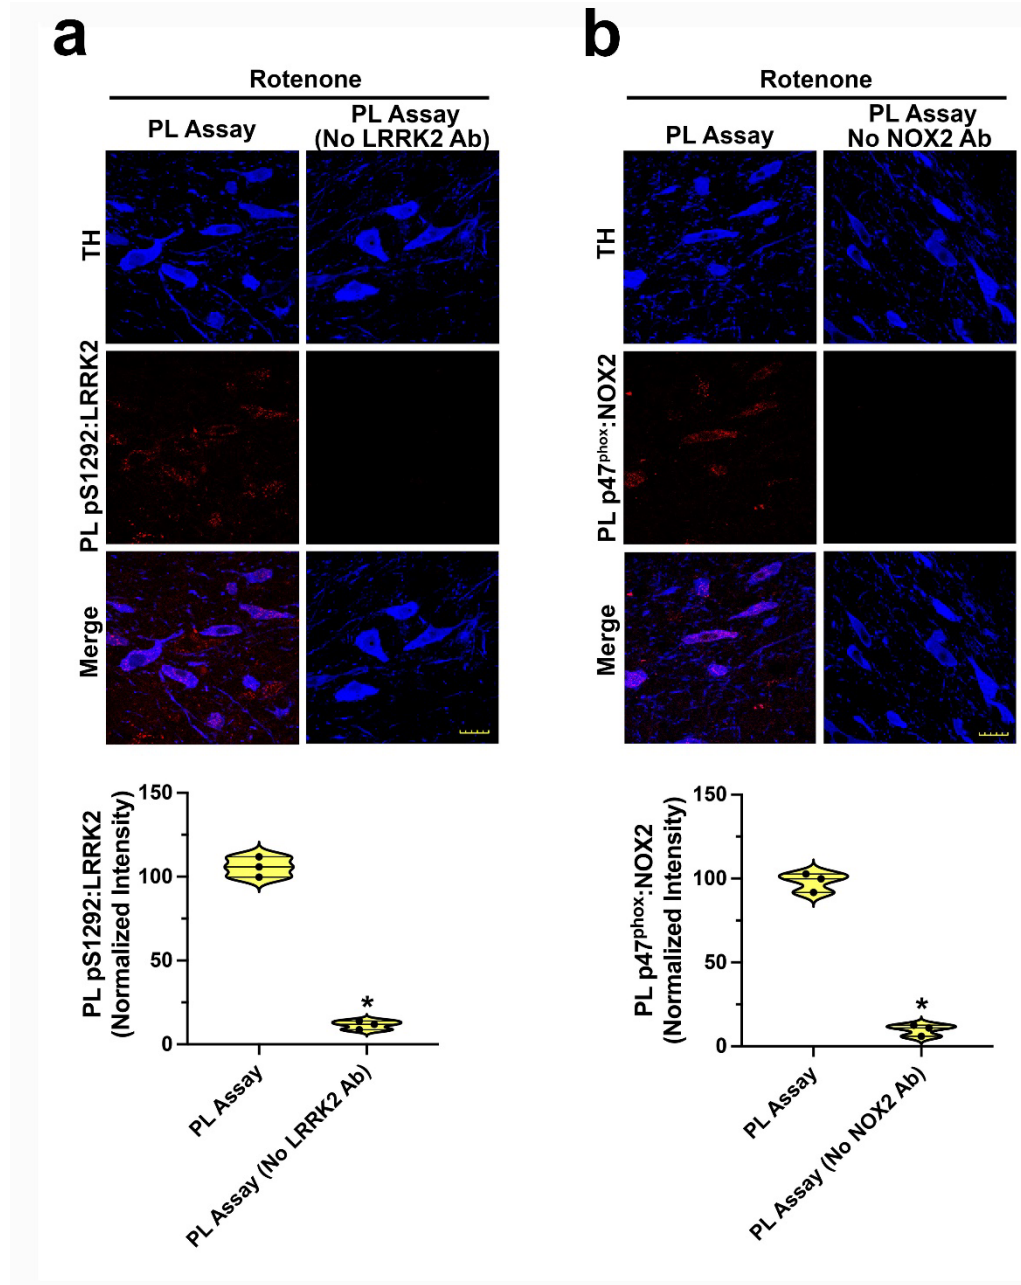

**Supplementary Figure 8. Validation of PL assays for LRRK2 and NOX2 by antibody depletion.** (a, upper panel) PL pS1292:LRRK2 signal (red) disappears in dopaminergic neurons (TH, blue) not exposed to LRRK2 (N241A) Ab (Scale bar: 30 $\mu$ m). (a, lower graph) Quantification of the PL-related fluorescence signal. (b, upper panel) PL p47<sup>phox</sup>:NOX2 signal (red) disappears in dopaminergic neurons (TH, blue) not exposed to NOX2 (gp91<sup>phox</sup>) Ab (Scale bar: 30 $\mu$ m). (b, lower graph) Quantification of the PL-related fluorescence signal. Symbols represent the normalized means of the intensity (with rotenone set at 100%) from a single animal (6 slices/animal). Statistical analysis was performed by unpaired t-test (\*,  $p < 0.0001$ ).

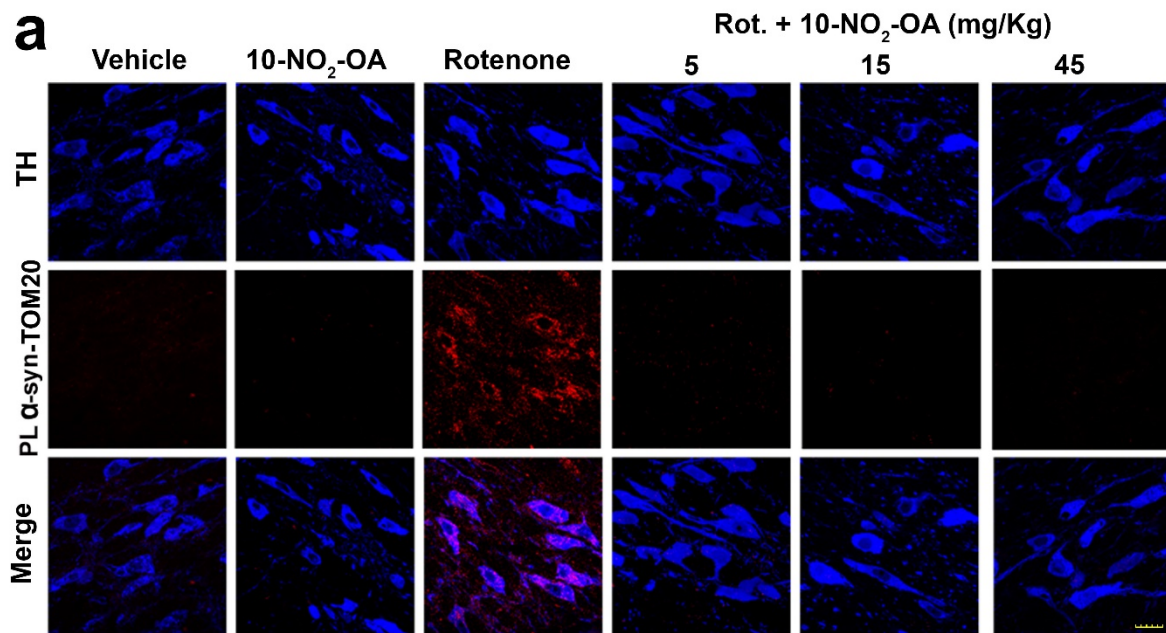

**b**

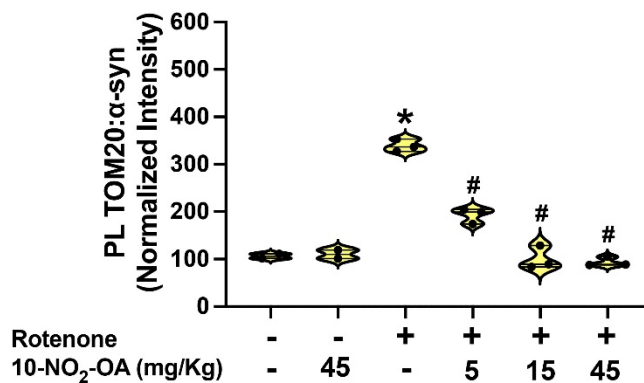

**Supplementary Figure 9. 10-NO<sub>2</sub>-OA inhibits α-synuclein-mediated mitochondrial import impairment in the subacute PD model of rotenone.** (a) Confocal microscopy of PL α-synuclein:TOM20 (red) in dopaminergic neurons (TH, blue) in the SNpc of rats (cohort 1 - Scale bar: 30μm). (b) Quantification of the fluorescence signal. Symbols represent the normalized means of the intensity (with Vehicle set at 100%) from a single animal (6 slices /animal). Statistical analysis was performed by one-way ANOVA with post

hoc Bonferroni correction (\*,  $p < 0.0001$  compared to Vehicle, #,  $p < 0.0001$  compared to Rotenone).

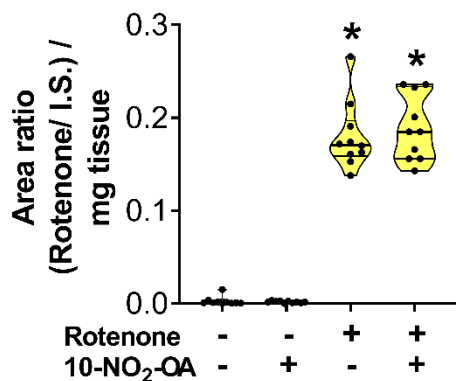

**Supplementary Figure 10. Analysis of rotenone in whole rat brain (cohort 2).** HPLC-MS-MS analysis of rotenone levels. Statistical analysis was performed by one-way ANOVA with post hoc Bonferroni correction (\*,  $p < 0.0001$  compared to Vehicle, and 10-NO<sub>2</sub>-OA).
